# Supplementary material for: Temperature-modulated graphene oxide resistive humidity sensor for indoor air quality monitoring
Source: Royal Society of Chemistry journal article supplement (doi:10.1039/c5nr08598e), 2016-01-01
Supplement: c5nr08598e1.pdf [file c5nr08598e1.pdf]

## Temperature-Modulated Graphene Oxide Resistive Humidity Sensor for Indoor Air Quality Monitoring

*A. De Luca, S. Santra, R. Ghosh, S. Z. Ali, J. W. Gardner, P. K. Guha, and F. Udre*

### Supplementary material

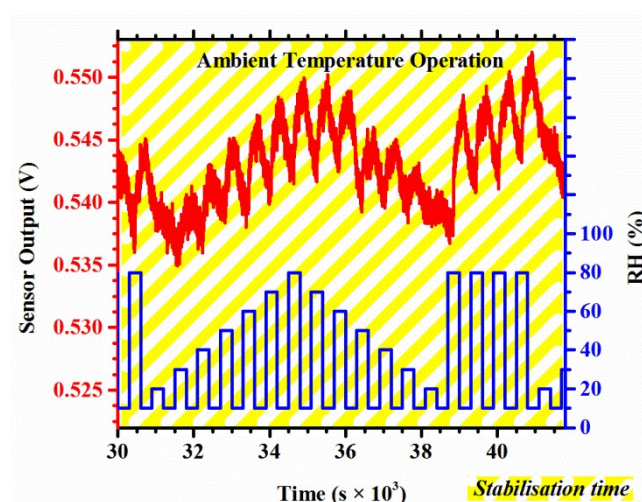

**S1:** Ambient temperature operation: humidity sensor output as a function of time for different RH levels. (Enlargement of **Fig. 3a**).

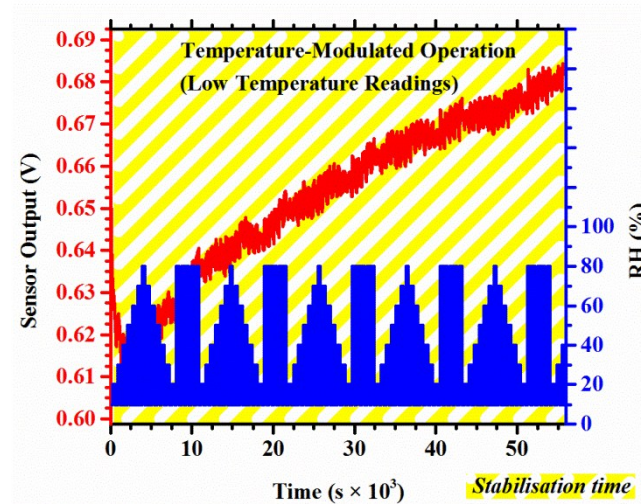

**S2:** Temperature-modulated operation: humidity sensor output as a function of time for different RH levels. (Only the low temperature readings,  $V_{25\text{ }^{\circ}\text{C}}$ , are considered as sensor output).

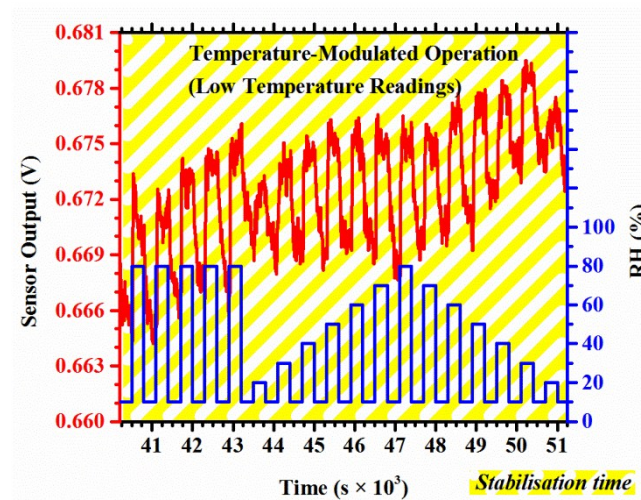

**S3:** Temperature-modulated operation: humidity sensor output as a function of time for different RH levels. (Only the low temperature readings,  $V_{25\text{ }^{\circ}\text{C}}$ , are considered as sensor output, enlargement of **S2**)

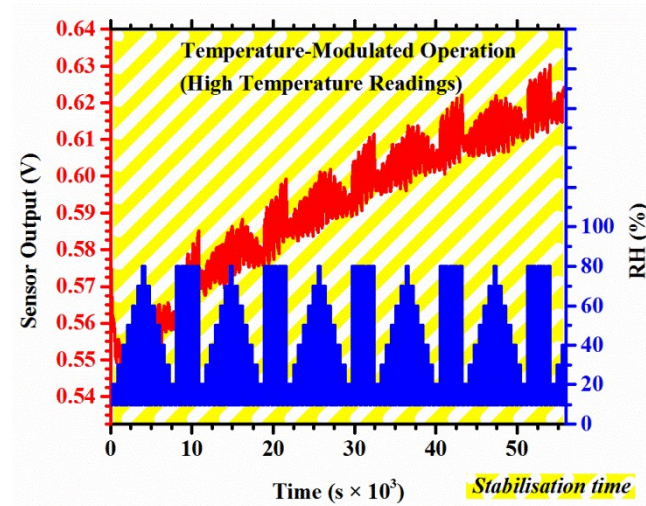

**S4:** Temperature-modulated operation: humidity sensor output as a function of time for different RH levels. (Only the high temperature readings,  $V_{50}^{\circ C}$ , are considered as sensor output)

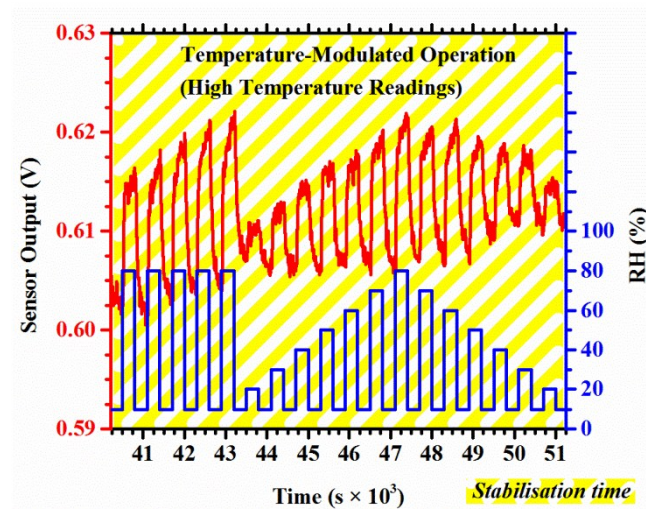

**S5:** Temperature-modulated operation: humidity sensor output as a function of time for different RH levels. (Only the high temperature readings,  $V_{50}^{\circ C}$ , are considered as sensor output, enlargement of **S4**)

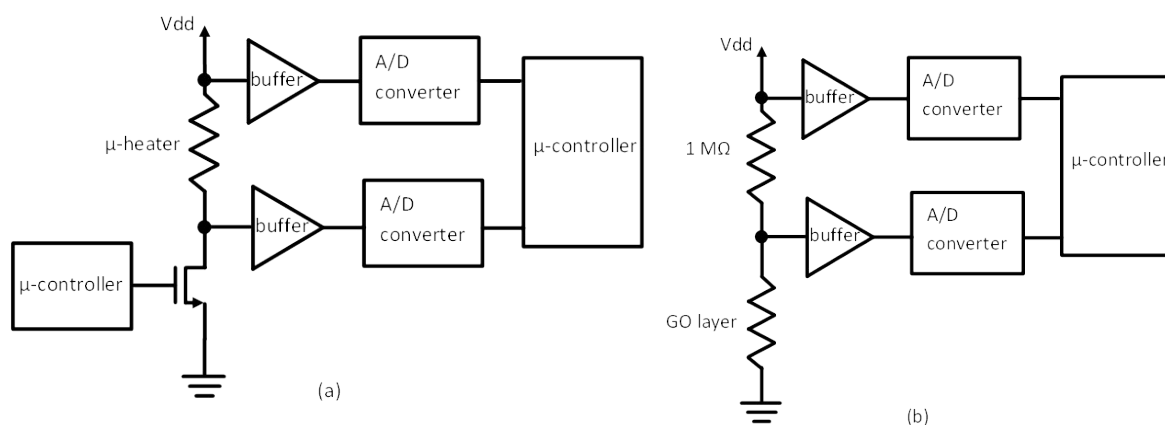

**S6:** Schematic diagrams depicting (a) micro-heater driving circuit and (b) GO layer readout circuit, implemented on PCB.

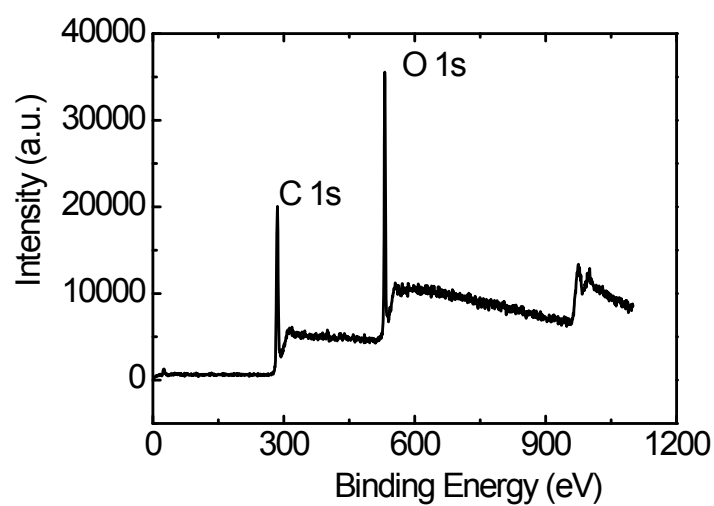

**S7:** XPS surface survey of GO.
